# Supplementary material for: Composite of KLVFF-Transthyretin-Penetratin and Manganese Dioxide Nanoclusters: A Multifunctional Agent against Alzheimer’s β-Amyloid Fibrillogenesis
Source: MDPI journal article supplement (doi:10.3390/molecules29061405), 2024-03-21
Supplement: s1 [file s1]

# Supporting information

## Composite of KLVFF-Transthyretin-Penetratin and Manganese Dioxide Nanoclusters: A Multifunctional Agent against Alzheimer's $\beta$ -Amyloid Fibrillogenesis

Haitao Lan <sup>1,†</sup>, Ying Wang <sup>1,†</sup>, Wei Liu <sup>2,\*</sup>, Xiaoyan Dong <sup>1</sup> and Yan Sun <sup>1,\*</sup>

<sup>1</sup> Key Laboratory of Systems Bioengineering and Frontiers Science Center for Synthetic Biology (Ministry of Education), Department of Biochemical Engineering, School of Chemical Engineering and Technology, Tianjin University, Tianjin 300350, China; lanhaitao@tju.edu.cn (H.L.); 1020207109@tju.edu.cn (Y.W.); d\_xy@tju.edu.cn (X.D.)

<sup>2</sup> Tianjin Key Laboratory of Radiation Medicine and Molecular Nuclear Medicine, Institute of Radiation Medicine, Chinese Academy of Medical Sciences and Peking Union Medical College, Tianjin 300192, China

\* Correspondence: liuwe@irm-cams.ac.cn (W.L.); ysun@tju.edu.cn (Y.S.); Tel./Fax: +86-22-27403389 (Y.S.)

<sup>†</sup> These authors contributed equally to this work.

**Table S1.** Lag time ( $T_{lag}$ ) of A $\beta_{40}$  aggregation kinetics calculated from Figure S2.

| Sample                                          | $T_{lag}$ (h)  |
|-------------------------------------------------|----------------|
| A $\beta$ only                                  | 49.8 $\pm$ 5.8 |
| A $\beta$ + 10 $\mu$ g/mL TTR                   | 58.5 $\pm$ 2.1 |
| A $\beta$ + 25 $\mu$ g/mL TTR                   | 81.1 $\pm$ 3.0 |
| A $\beta$ + 50 $\mu$ g/mL TTR                   | 86.5 $\pm$ 2.2 |
| A $\beta$ + 10 $\mu$ g/mL KTP                   | 16.8 $\pm$ 1.5 |
| A $\beta$ + 25 $\mu$ g/mL KTP                   | 26.4 $\pm$ 2.5 |
| A $\beta$ + 50 $\mu$ g/mL KTP                   | — —            |
| A $\beta$ + 10 $\mu$ g/mL KTP @MnO <sub>2</sub> | 21.2 $\pm$ 3.1 |
| A $\beta$ + 25 $\mu$ g/mL KTP @MnO <sub>2</sub> | 68.1 $\pm$ 3.5 |
| A $\beta$ + 50 $\mu$ g/mL KTP @MnO <sub>2</sub> | — —            |

**Table S2.** The content of secondary structure of A $\beta_{40}$  incubated with different inhibitor was calculated by the BeStSel algorithm (<http://bestsel.elte.hu/>). Others include 3<sub>10</sub>-helix, bends,  $\pi$ -helix,  $\beta$ -bridge, and irregular/loop.

| Secondary structure         | A $\beta$ only | A $\beta$ only (0 h) | + 50 $\mu$ g/mL TTR | + 50 $\mu$ g/mL KTP | + 50 $\mu$ g/mL KTP@MnO <sub>2</sub> |
|-----------------------------|----------------|----------------------|---------------------|---------------------|--------------------------------------|
| Helix                       | 22.4           | 30.3                 | 12.8                | 11.3                | 0                                    |
| Antiparallel $\beta$ -sheet | 20.5           | 64.8                 | 35.5                | 44.9                | 44.5                                 |
| Parallel $\beta$ -sheet     | 57.1           | 0                    | 36.8                | 0                   | 0                                    |
| Turn                        | 0              | 0                    | 15                  | 13.2                | 9.7                                  |
| Others                      | 0              | 5                    | 0                   | 30.6                | 45.8                                 |

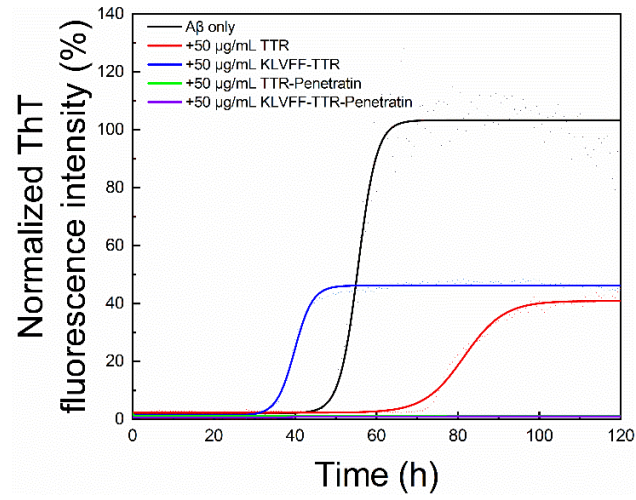

**Figure S1.** Aggregation kinetics of A $\beta$ <sub>40</sub> incubated with TTR-derived proteins.

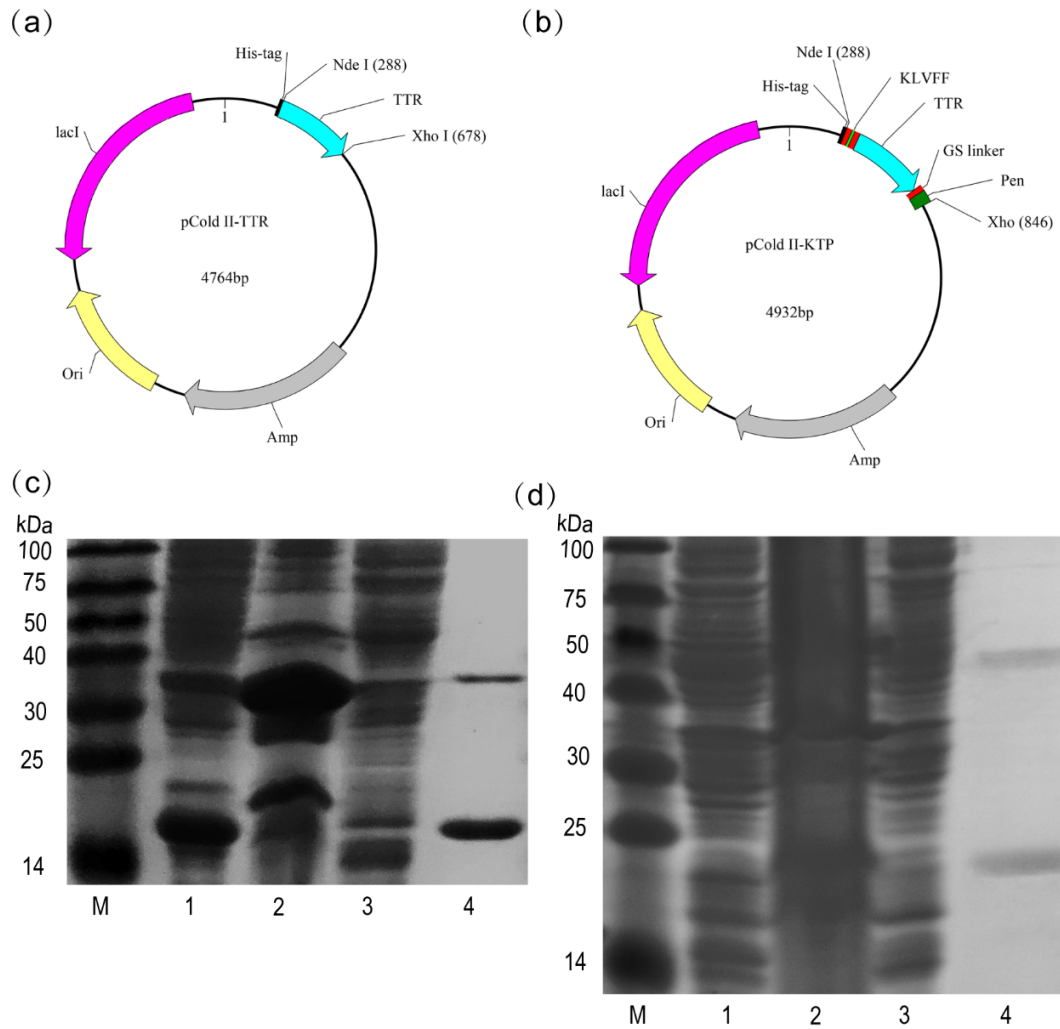

**Figure S2.** (a)-(b) Construction of pCold II-TTR and pCold II-KTP expression vectors. (c) SDS-PAGE of TTR. Lanes: M, protein marker; 1, supernatant of cell lysate; 2, precipitate of cell lysate; 3, washing eluent; 4, purified TTR. (d) SDS-PAGE of KTP. Lanes: M, protein marker; 1, supernatant of cell lysate; 2, precipitate of cell lysate; 3, washing eluent; 4, purified KTP.

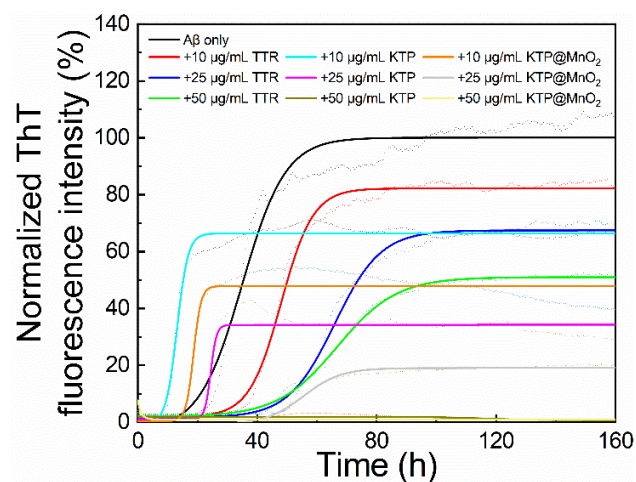

**Figure S3.** Aggregation kinetics of A $\beta_{40}$  incubated with different concentrations of TTR, KTP or KTP@MnO<sub>2</sub>.

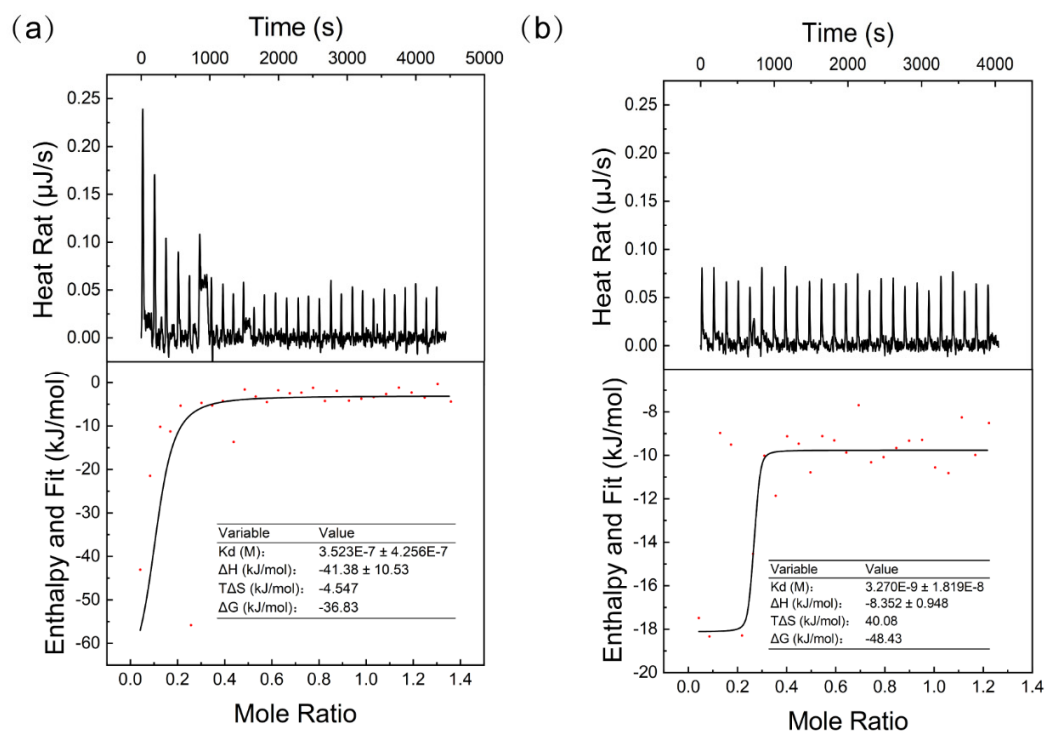

**Figure S4.** ITC binding isotherm for the titration of (a) TTR and (b) KTP to A $\beta_{40}$ .

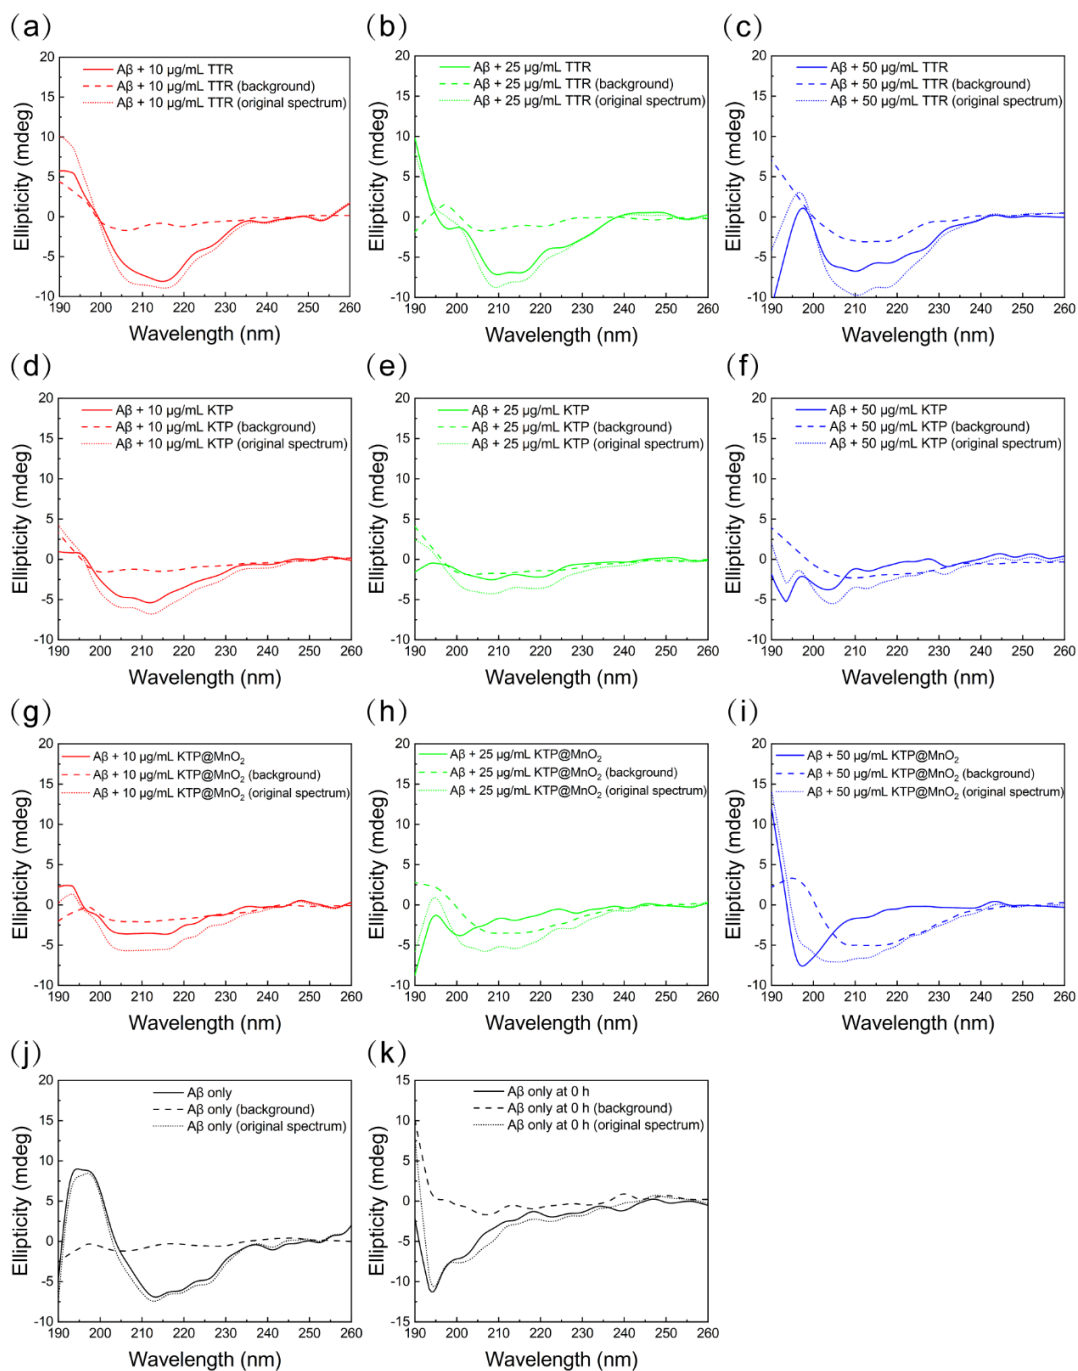

**Figure S5.** CD spectra of Aβ<sub>40</sub> incubated with (a) 10 μg/mL TTR, (b) 25 μg/mL TTR, (c) 50 μg/mL TTR, (d) 10 μg/mL KTP, (e) 25 μg/mL KTP, (f) 50 μg/mL KTP, (g) 10 μg/mL KTP@MnO<sub>2</sub>, (h) 25 μg/mL KTP@MnO<sub>2</sub>, and (i) 50 μg/mL KTP@MnO<sub>2</sub>. (j) CD spectra of Aβ<sub>40</sub> after incubation. (k) CD spectra of Aβ<sub>40</sub> without incubation. (Background is an Aβ-free solution, and the spectrum corresponding to the solid line is the original spectrum minus the background spectrum).

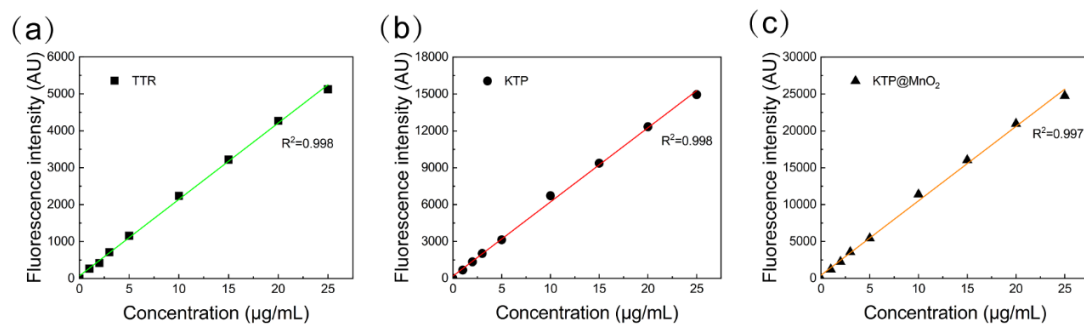

**Figure S6.** Standard curves of Cy5 fluorescence intensity of (a) TTR, (b) KTP, and (c) KTP@MnO<sub>2</sub>.

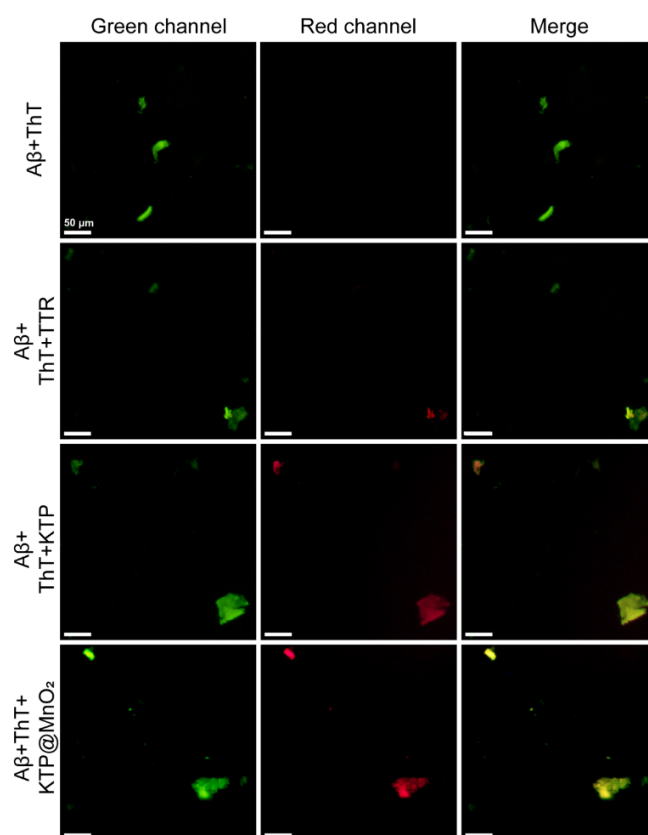

**Figure S7.** *In vitro* targeting capability of different inhibitors. Aβ plaques were stained with Aβ-specific probe ThT (Green channel) and incubated with Cy5-labelled inhibitors (Red channel). Scale bars, 50 μm.

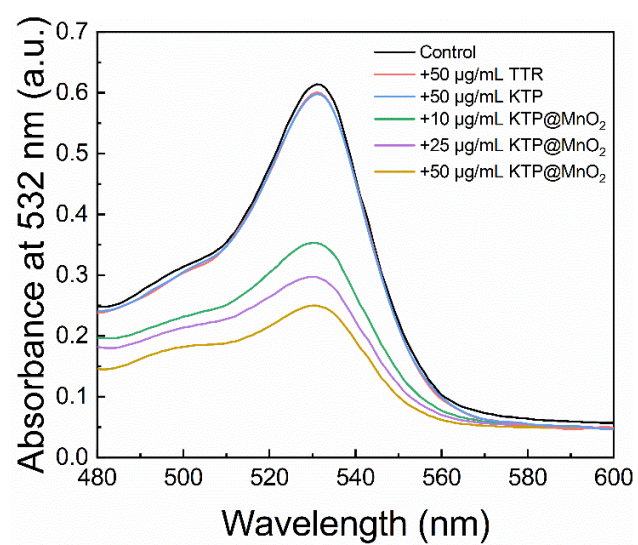

**Figure S8.**  $\cdot\text{OH}$  scavenging ability of different inhibitors.
